# Supplementary material for: Interactions of the N3 dye with the iodide redox shuttle: quantum chemical mechanistic studies of the dye regeneration in the dye-sensitized solar cell
Source: Royal Society of Chemistry journal article supplement (doi:10.1039/c1cp21168d), 2011-01-01
Supplement: c1cp21168d.pdf [file c1cp21168d.pdf]

## Electronic Supplementary Information

### Interactions of the N3 Dye with the Iodide Redox Shuttle: Quantum Chemical Mechanistic Studies of the Dye Regeneration in Dye- Sensitized Solar Cell

Abu Md. Asaduzzaman\* and Georg Schreckenbach\*

**Full citation for reference 53:** Frisch, M. J.; Trucks, G. W.; Schlegel, H. B.; Scuseria, G. E.; Robb, M. A.; Cheeseman, J. R.; Montgomery, J. A.; Vreven, T.; Kudin, K. N.; Burant, J. C.; Millam, J. M.; Iyengar, S. S.; Tomasi, J.; Barone, V.; Mennucci, B.; Cossi, M.; Scalmani, G.; Rega, N.; Petersson, G. A.; Nakatsuji, H.; Hada, M.; Ehara, M.; Toyota, K.; Fukuda, R.; Hasegawa, J.; Ishida, M.; Nakajima, T.; Honda, Y.; Kitao, O.; Nakai, H.; Klene, M.; Li, X.; Knox, J. E.; Hratchian, H. P.; Cross, J. B.; Bakken, V.; Adamo, C.; Jaramillo, J.; Gomperts, R.; Stratmann, R. E.; Yazyev, O.; Austin, A. J.; Cammi, R.; Pomelli, C.; Ochterski, J. W.; Ayala, P. Y.; Morokuma, K.; Voth, G. A.; Salvador, P.; Dannenberg, J. J.; Zakrzewski, V. G.; Dapprich, S.; Daniels, A. D.; Strain, M. C.; Farkas, O.; Malick, D. K.; Rabuck, A. D.; Raghavachari, K.; Foresman, J. B.; Ortiz, J. V.; Cui, Q.; Baboul, A. G.; Clifford, S.; Cioslowski, J.; Stefanov, B. B.; Liu, G.; Liashenko, A.; Piskorz, P.; Komaromi, I.; Martin, R. L.; Fox, D. J.; Keith, T.; Al-Laham, M. A.; Peng, C. Y.; Nanayakkara, A.; Challacombe, M.; Gill, P. M. W.; Johnson, B.; Chen, W.; Wong, M. W.; Gonzalez, C.; Pople, J. A. *Gaussian 03*, Gaussian, Inc.: Wallingford CT, 2004.

**Table S1.** Bond distances of  $I_2$ ,  $I_2^-$ , and  $I_3^-$ ; this work and selected previous studies (Å).

| Method; <i>code</i>                         | Reference                     | $I_2$ | $I_2^-$ | $I_3^-$ |
|---------------------------------------------|-------------------------------|-------|---------|---------|
| All-electron scalar, PBE; <i>p6</i>         | This work                     | 2.69  | 3.32    | 2.98    |
| Scalar SC-ECP-SDD B3LYP; <i>g03</i>         | 49                            | 2.73  | 3.38    | 3.02    |
| SC-ECP-AUG-cc-pVTZ, PW91; <i>g03</i>        | 66                            | 2.69  | 3.28    | 2.98    |
| Scalar SC-ECP B3LYP; <i>Dirac04</i>         | 71                            | 2.70  |         |         |
| Spin-orbit SC-ECP B3LYP; <i>Dirac04</i>     | 71                            | 2.72  |         |         |
| Scalar SC-ECP CCSD(T) TZ                    | Cited from ref. <sup>71</sup> | 2.70  |         |         |
| Scalar LC-ECP (lacvp*) B3LYP; <i>Jaguar</i> | 44                            |       | 3.46    | 3.14    |
| Experiment                                  | Cited from ref. <sup>66</sup> | 2.67  | 3.23    |         |

Table S2: Transition state barriers for different elementary reactions in the dye regeneration using B3LYP. The reactant, product and transition state structures corresponding to Figures 1, 2 and 3. The energy of reactants of all reactions is set to zero in order to present the barrier height and exothermicity of each reaction. The reaction scheme is followed by their corresponding energy (Kcal/mol).

| Reactant                                   | Transition State | Product                                    |
|--------------------------------------------|------------------|--------------------------------------------|
| N3I <sub>OH</sub><br>0.00                  | TS-1<br>6.75     | N3I <sub>Ru</sub><br>-1.96                 |
| N3I <sub>Ru</sub> + I <sup>-</sup><br>0.00 | TS-2<br>3.69     | N3I <sub>Ru</sub> -I<br>-4.61              |
| N3I <sub>OH</sub> + I <sup>-</sup><br>0.00 | TS-3<br>12.24    | N3I <sub>OH</sub> -I<br>-5.73              |
| N3I <sub>Ru</sub> -I<br>0.00               | TS-4<br>4.88     | N3 + I <sub>2</sub> <sup>-</sup><br>-12.50 |
| N3I <sub>OH</sub> -I<br>0.00               | TS-5<br>5.23     | N3 + I <sub>2</sub> <sup>-</sup><br>-9.83  |

**Charge, Spin-state, Electronic energy, Free energy correction, Solvation free energy, Spin-orbit correction, Imaginary frequency (where applicable) and Cartesian coordinates (Å) for optimized structures.**

The titles correspond to the figure number of manuscript.

| <b>N3</b>                              |             |             |             | <b>N3<sup>+</sup></b>                  |             |             |             |
|----------------------------------------|-------------|-------------|-------------|----------------------------------------|-------------|-------------|-------------|
| Charge = 0                             |             |             |             | Charge = 0                             |             |             |             |
| Spin-state = 0                         |             |             |             | Spin-state = 0                         |             |             |             |
| Electronic energy = -7260.261452 au.   |             |             |             | Electronic energy = -7260.040101       |             |             |             |
| Free energy Correction = 193.7129 Kcal |             |             |             | Free energy Correction = 196.0439 Kcal |             |             |             |
| Solvation free energy = -23.59 Kcal    |             |             |             | Solvation free energy = -47.21 Kcal    |             |             |             |
| Spin-orbit correction = 12.67 Kcal     |             |             |             | Spin-orbit correction = 12.98 Kcal     |             |             |             |
| Ru                                     | -0.01063264 | -0.03495690 | -0.70521900 | Ru                                     | -0.01432840 | -0.03924546 | -0.78514476 |
| N                                      | 1.97281092  | -0.50918996 | -0.65253074 | N                                      | 1.99519449  | -0.48481751 | -0.73845566 |
| C                                      | 2.76532101  | 0.32863008  | 0.09293585  | C                                      | 2.76472590  | 0.29894645  | 0.07960814  |
| C                                      | 4.14925100  | 0.16267131  | 0.13241803  | C                                      | 4.14752388  | 0.13252281  | 0.14333141  |
| C                                      | 4.74857364  | -0.86265031 | -0.59712114 | C                                      | 4.76630225  | -0.83587421 | -0.64484396 |
| C                                      | 3.92895150  | -1.70726251 | -1.36311074 | C                                      | 3.97268052  | -1.62026894 | -1.49029443 |
| C                                      | 2.55957479  | -1.49895232 | -1.36679392 | C                                      | 2.60011610  | -1.41424056 | -1.51106021 |
| C                                      | 6.23050946  | -0.99747425 | -0.52730522 | C                                      | 6.25634292  | -0.97024716 | -0.54138775 |
| O                                      | 6.95357937  | -0.28385058 | 0.13929253  | O                                      | 6.93531571  | -0.29772539 | 0.20394004  |
| O                                      | 6.69291600  | -2.01897224 | -1.29730440 | O                                      | 6.73635030  | -1.92352426 | -1.37144698 |
| N                                      | 0.67021204  | 1.33333292  | 0.64135609  | N                                      | 0.67315439  | 1.32060302  | 0.62299740  |
| C                                      | -0.08572191 | 2.22467502  | 1.32859406  | C                                      | -0.08689677 | 2.21895108  | 1.28418514  |
| C                                      | 0.44931332  | 3.15063458  | 2.20472423  | C                                      | 0.44162054  | 3.12337317  | 2.19367487  |
| C                                      | 1.84129889  | 3.18227926  | 2.40040341  | C                                      | 1.82007953  | 3.10417643  | 2.43859941  |
| C                                      | 2.62615105  | 2.26525476  | 1.70256688  | C                                      | 2.60963667  | 2.18066934  | 1.75730721  |
| C                                      | 2.03318175  | 1.35140752  | 0.83360567  | C                                      | 2.02224493  | 1.29822103  | 0.85021743  |
| C                                      | 2.52118385  | 4.13862303  | 3.31298778  | C                                      | 2.50386012  | 4.03140412  | 3.40047021  |
| O                                      | 1.64493065  | 4.98733314  | 3.91949448  | O                                      | 1.63359740  | 4.89126312  | 3.97681365  |
| O                                      | 3.72066799  | 4.17035791  | 3.50722547  | O                                      | 3.69402050  | 3.99941122  | 3.62334855  |
| N                                      | -0.65445874 | -1.27287940 | 0.77836123  | N                                      | -0.66324713 | -1.26320259 | 0.75930791  |
| C                                      | -2.01199384 | -1.27258231 | 1.00661547  | C                                      | -2.00575768 | -1.21724116 | 1.01964120  |
| C                                      | -2.58023603 | -2.09988951 | 1.97330511  | C                                      | -2.56789943 | -2.01014291 | 2.02056933  |
| C                                      | -1.77559331 | -2.94655048 | 2.73463306  | C                                      | -1.75968116 | -2.86764512 | 2.76347308  |
| C                                      | -0.38916440 | -2.93367530 | 2.50093308  | C                                      | -0.38837136 | -2.91244138 | 2.48414973  |
| C                                      | 0.12097135  | -2.09513797 | 1.52739705  | C                                      | 0.11487554  | -2.09769468 | 1.48045532  |
| C                                      | -2.42942150 | -3.81150752 | 3.75142420  | C                                      | -2.41660379 | -3.69954514 | 3.82596129  |
| O                                      | -3.62342008 | -3.82457226 | 3.97883706  | O                                      | -3.60035748 | -3.64472663 | 4.07677651  |
| O                                      | -1.53576102 | -4.59858869 | 4.41320901  | O                                      | -1.53047382 | -4.50314386 | 4.45674731  |
| N                                      | -1.99407067 | 0.44297249  | -0.64603810 | N                                      | -2.02246004 | 0.41096232  | -0.72748132 |
| C                                      | -2.60182296 | 1.36149749  | -1.43407197 | C                                      | -2.64851225 | 1.26524707  | -1.56708454 |
| C                                      | -3.97176976 | 1.56594200  | -1.41746230 | C                                      | -4.02037234 | 1.47369165  | -1.52984025 |
| C                                      | -4.76949284 | 0.79336735  | -0.55827732 | C                                      | -4.79065724 | 0.77203639  | -0.59484328 |
| C                                      | -4.14879353 | -0.15872202 | 0.24852286  | C                                      | -4.15028088 | -0.11965158 | 0.26344959  |
| C                                      | -2.76538996 | -0.32410168 | 0.19208642  | C                                      | -2.76937043 | -0.29272623 | 0.17950450  |
| C                                      | -6.25020956 | 0.92977607  | -0.46684310 | C                                      | -6.27769399 | 0.91705375  | -0.46552749 |
| O                                      | -6.73521361 | 1.87372168  | -1.31755268 | O                                      | -6.78029409 | 1.78978637  | -1.36770879 |
| O                                      | -6.95407066 | 0.27915652  | 0.27992305  | O                                      | -6.93623008 | 0.31734669  | 0.35633617  |
| N                                      | 0.39071605  | 1.26148573  | -2.17317086 | N                                      | 0.36700383  | 1.30192568  | -2.17316559 |
| C                                      | 0.59249433  | 2.08256392  | -3.01258520 | C                                      | 0.71684279  | 2.19014211  | -2.89264356 |

|   |             |             |             |   |             |             |             |
|---|-------------|-------------|-------------|---|-------------|-------------|-------------|
| S | 0.84060808  | 3.20596609  | -4.14279312 | S | 1.14374654  | 3.38037138  | -3.87765036 |
| N | -0.45033756 | -1.45679809 | -2.03995357 | N | -0.43018394 | -1.50030151 | -2.03539310 |
| C | -0.70849102 | -2.32981359 | -2.80870925 | C | -0.79715665 | -2.44850010 | -2.66405248 |
| S | -1.03543792 | -3.52373976 | -3.84240138 | S | -1.24744729 | -3.72124845 | -3.52803808 |
| H | 4.78589319  | 0.82472316  | 0.71757592  | H | 4.77190132  | 0.74754747  | 0.79026333  |
| H | 4.35447303  | -2.51075115 | -1.96046188 | H | 4.41622690  | -2.37911887 | -2.13193063 |
| H | 1.88032345  | -2.11098178 | -1.95758531 | H | 1.94084832  | -1.98930197 | -2.15805790 |
| H | 7.66411572  | -2.01338312 | -1.18551033 | H | 7.70697581  | -1.94240438 | -1.24718779 |
| H | -1.15621540 | 2.18095104  | 1.13840622  | H | -1.15103661 | 2.20407127  | 1.05660027  |
| H | -0.20433987 | 3.84874023  | 2.72334171  | H | -0.20879478 | 3.83403781  | 2.69943792  |
| H | 3.70429781  | 2.28385757  | 1.85544674  | H | 3.68149573  | 2.17529125  | 1.95083156  |
| H | 2.19308980  | 5.56740230  | 4.48396574  | H | 2.15590839  | 5.45820903  | 4.58002240  |
| H | -3.65401013 | -2.10359036 | 2.15523695  | H | -3.63410731 | -1.98449779 | 2.24172182  |
| H | 0.27930420  | -3.57935626 | 3.06646928  | H | 0.27588372  | -3.57414022 | 3.03623771  |
| H | 1.18614690  | -2.06973104 | 1.30656290  | H | 1.17248238  | -2.10608674 | 1.22393033  |
| H | -2.06783546 | -5.12202381 | 5.04447665  | H | -2.03591574 | -5.01016172 | 5.12424888  |
| H | -1.94021708 | 1.91890497  | -2.09468138 | H | -2.00714594 | 1.77715507  | -2.28162283 |
| H | -4.41446645 | 2.31002881  | -2.07611591 | H | -4.48151662 | 2.17013701  | -2.22740706 |
| H | -4.76869044 | -0.76581159 | 0.90669115  | H | -4.75679169 | -0.67138179 | 0.98064804  |
| H | -7.70359980 | 1.87576088  | -1.18346453 | H | -7.74738957 | 1.82121521  | -1.22057689 |

### N3I<sub>Ru</sub>

Charge = 0  
Spin-state = 1  
Electronic energy = -14377.738078 au.  
Free energy Correction = 191.0360 Kcal  
Solvation free energy = -19.82  
Spin-orbit correction = 22.64 Kcal

|    |             |             |             |
|----|-------------|-------------|-------------|
| Ru | 0.01752721  | -0.05514693 | -0.85789869 |
| N  | 2.01275123  | -0.51379173 | -0.79422573 |
| C  | 2.77788112  | 0.26003317  | 0.03984271  |
| C  | 4.15754653  | 0.07318681  | 0.12459962  |
| C  | 4.77714889  | -0.90407254 | -0.65226613 |
| C  | 3.98585587  | -1.67884971 | -1.51269122 |
| C  | 2.61938103  | -1.45250114 | -1.55686165 |
| C  | 6.25559079  | -1.06428150 | -0.52778005 |
| O  | 6.95328635  | -0.40661667 | 0.21692952  |
| O  | 6.73805012  | -2.03667775 | -1.34546792 |
| N  | 0.68313435  | 1.29933839  | 0.54341736  |
| C  | -0.08789644 | 2.16962297  | 1.22585090  |
| C  | 0.43212898  | 3.04701730  | 2.17459332  |
| C  | 1.80544834  | 3.03503939  | 2.42403144  |
| C  | 2.60623086  | 2.11750280  | 1.73455287  |
| C  | 2.03297756  | 1.25890064  | 0.80535155  |
| C  | 2.47136633  | 3.93909165  | 3.40643307  |
| O  | 1.59982427  | 4.80268137  | 3.98506759  |
| O  | 3.65910602  | 3.90914150  | 3.66123741  |
| N  | -0.62226259 | -1.26795032 | 0.68649208  |
| C  | -1.95307666 | -1.19325963 | 0.97903555  |
| C  | -2.51240036 | -1.97696288 | 1.99190342  |
| C  | -1.70975976 | -2.86121306 | 2.70581799  |

### N3IO<sub>H</sub>

Charge = 0  
Spin-state = 1  
Electronic energy = -14377.732700 au.  
Free energy Correction = 189.0560 Kcal  
Solvation free energy = -25.65 Kcal  
Spin-orbit correction = 20.56 Kcal

|    |             |             |             |
|----|-------------|-------------|-------------|
| Ru | -0.02012739 | -0.06054851 | -0.78897646 |
| C  | -2.76379304 | -0.30914438 | 0.16987433  |
| N  | -2.00921875 | 0.40747185  | -0.72394161 |
| C  | -2.62965639 | 1.28989734  | -1.54145706 |
| C  | -3.99734546 | 1.50908979  | -1.49814376 |
| C  | -4.77710219 | 0.78911224  | -0.58114430 |
| C  | -4.14368896 | -0.12800581 | 0.25545896  |
| N  | -0.44852757 | -1.52144132 | -2.07034827 |
| C  | -0.73278344 | -2.45322739 | -2.75692910 |
| S  | -1.08648791 | -3.71750623 | -3.69112305 |
| C  | -6.25613353 | 0.94714465  | -0.45611294 |
| O  | -6.94233204 | 0.33490029  | 0.33632041  |
| C  | -1.99995398 | -1.23552060 | 1.00251809  |
| N  | -0.65216261 | -1.26604242 | 0.74022587  |
| C  | 0.13084268  | -2.08385527 | 1.48210838  |
| C  | -0.36590992 | -2.88920430 | 2.49250872  |
| C  | -1.74217620 | -2.86609965 | 2.76598627  |
| C  | -2.55546711 | -2.02642229 | 2.00705208  |
| C  | -2.38457553 | -3.69253171 | 3.82846639  |
| O  | -1.48559301 | -4.46884280 | 4.48845669  |
| N  | 1.97652194  | -0.51620782 | -0.73722201 |
| C  | 2.75548556  | 0.29032701  | 0.05210057  |
| C  | 4.13888525  | 0.12449340  | 0.10595464  |

|   |             |             |             |   |             |             |             |
|---|-------------|-------------|-------------|---|-------------|-------------|-------------|
| C | -0.33809820 | -2.90685058 | 2.41748193  | C | 4.74978819  | -0.86884876 | -0.65774695 |
| C | 0.16137386  | -2.09862860 | 1.41128781  | C | 3.94490469  | -1.67983197 | -1.47013465 |
| C | -2.35398701 | -3.70187480 | 3.75611222  | C | 2.57450088  | -1.47238286 | -1.48511948 |
| O | -3.54630252 | -3.72348653 | 3.97775415  | C | 2.01836053  | 1.30180253  | 0.80966074  |
| O | -1.44887072 | -4.45369768 | 4.43947017  | N | 0.66906506  | 1.32472569  | 0.57474506  |
| N | -1.98003108 | 0.41714698  | -0.77986981 | C | -0.08796883 | 2.22670251  | 1.23675789  |
| C | -2.60291950 | 1.29529727  | -1.59833647 | C | 0.44081719  | 3.12056622  | 2.15526365  |
| C | -3.96479932 | 1.53959132  | -1.52379746 | C | 1.81699399  | 3.09687098  | 2.41234621  |
| C | -4.73084068 | 0.85050316  | -0.57311656 | C | 2.60378401  | 2.17747188  | 1.72368964  |
| C | -4.09138655 | -0.05286121 | 0.27202631  | C | 6.23436120  | -1.00489842 | -0.57225344 |
| C | -2.71770114 | -0.26044832 | 0.15035869  | O | 6.70636055  | -1.99070595 | -1.37906079 |
| C | -6.20450181 | 1.03243520  | -0.42012708 | C | 2.49232812  | 4.00652946  | 3.40868135  |
| O | -6.69358110 | 1.98667083  | -1.25652541 | O | 3.68724830  | 3.94022103  | 3.62499402  |
| O | -6.89382952 | 0.40348118  | 0.35510397  | N | 0.36487566  | 1.23493129  | -2.24730448 |
| N | 0.41333213  | 1.25626444  | -2.28844293 | C | 0.63141899  | 2.05644179  | -3.06895264 |
| C | 0.71330040  | 2.09760824  | -3.07822277 | S | 0.95870166  | 3.17129717  | -4.18390096 |
| S | 1.08371344  | 3.23694659  | -4.15360025 | O | 6.94098542  | -0.31784797 | 0.13562305  |
| N | -0.41480544 | -1.51411881 | -2.13061929 | O | 1.61874999  | 4.83540669  | 3.98141929  |
| C | -0.70898881 | -2.45132957 | -2.80626627 | O | -3.57235498 | -3.67617792 | 4.07885564  |
| S | -1.07250315 | -3.72052534 | -3.72837952 | O | -6.74928311 | 1.85937595  | -1.33269232 |
| H | 4.77413556  | 0.68218531  | 0.78389446  | H | 4.76469749  | 0.76322570  | 0.72756074  |
| H | 4.42871679  | -2.44415152 | -2.14645817 | H | 4.38050796  | -2.45856788 | -2.09261659 |
| H | 1.96068643  | -2.01765302 | -2.21338151 | H | 1.90669279  | -2.06362769 | -2.10856104 |
| H | 7.70357962  | -2.05708472 | -1.19237942 | H | 7.67655138  | -1.99380323 | -1.25650525 |
| H | -1.15112709 | 2.16748928  | 1.00261883  | H | -1.15096094 | 2.21752824  | 1.00346044  |
| H | -0.24413069 | 3.71040747  | 2.70848571  | H | -0.20420810 | 3.83117237  | 2.66826744  |
| H | 3.67408718  | 2.10074999  | 1.94695557  | H | 3.67364196  | 2.16733941  | 1.93041047  |
| H | 2.12811712  | 5.33596397  | 4.61142154  | H | 2.08380335  | 5.42531160  | 4.66057542  |
| H | -3.57080072 | -1.91723791 | 2.23531496  | H | -3.62324576 | -2.00794131 | 2.22052531  |
| H | 0.32796582  | -3.56979681 | 2.96531861  | H | 0.30672660  | -3.53159421 | 3.05682473  |
| H | 1.21583051  | -2.11367676 | 1.14415344  | H | 1.18961734  | -2.08222959 | 1.23127920  |
| H | -1.96965446 | -4.95649892 | 5.09643192  | H | -2.00041657 | -4.96542579 | 5.15523660  |
| H | -1.96432599 | 1.79367311  | -2.32466398 | H | -1.98152407 | 1.81121139  | -2.24319486 |
| H | -4.42458972 | 2.25301780  | -2.20431913 | H | -4.45114398 | 2.22712460  | -2.17794685 |
| H | -4.68140220 | -0.57860463 | 1.01988849  | H | -4.75068429 | -0.69360779 | 0.96100853  |
| H | -7.65420236 | 2.02518851  | -1.07859192 | H | -7.71408740 | 1.88742259  | -1.17577983 |
| I | -2.39496736 | 1.24892366  | 3.60111419  | I | 2.80127835  | 6.94266317  | 6.36607189  |

### N3I<sub>Ru</sub>-I

Charge = -1  
 Spin-state = 1/2  
 Electronic energy = -21495.359414 au.  
 Free energy Correction = 187.0621 Kcal  
 Solvation free energy = -43.62 Kcal  
 Spin-orbit correction = 30.85 Kcal

|    |            |             |             |
|----|------------|-------------|-------------|
| Ru | 0.00453178 | -0.06458099 | -0.75700126 |
| N  | 1.98499011 | -0.51088808 | -0.71589398 |
| C  | 2.76374432 | 0.30168385  | 0.07510790  |
| C  | 4.14884157 | 0.15319070  | 0.11305550  |
| C  | 4.77041604 | -0.82925223 | -0.65928061 |
| C  | 3.96414341 | -1.64927134 | -1.46832432 |
| C  | 2.59391459 | -1.45886142 | -1.47165241 |

### N3I<sub>OH</sub>-I

Charge = 0  
 Spin-state = 1/2  
 Electronic energy = -21495.353527 au.  
 Free energy Correction = 187.8318 Kcal  
 Solvation free energy = -48.65 Kcal  
 Spin-orbit correction = 30.03 Kcal

|    |            |             |             |
|----|------------|-------------|-------------|
| Ru | 0.02078042 | -0.05026901 | -0.76546298 |
| N  | 2.00177609 | -0.52504559 | -0.72237677 |
| C  | 2.79590953 | 0.29671274  | 0.03891254  |
| C  | 4.18077538 | 0.13471089  | 0.06385494  |
| C  | 4.77974102 | -0.87295400 | -0.69217194 |
| C  | 3.95695016 | -1.70439889 | -1.46920053 |
| C  | 2.58835550 | -1.49812542 | -1.46067077 |

|   |             |             |             |   |             |             |             |
|---|-------------|-------------|-------------|---|-------------|-------------|-------------|
| C | 6.24621467  | -0.94853896 | -0.59120777 | C | 6.25880280  | -1.00912687 | -0.63945227 |
| O | 6.97361725  | -0.25932013 | 0.10047230  | O | 6.99806710  | -0.31127676 | 0.02689220  |
| O | 6.73103956  | -1.93725576 | -1.40126170 | O | 6.71737838  | -2.02218110 | -1.43145476 |
| N | 0.65331196  | 1.25777807  | 0.65508336  | N | 0.70746741  | 1.28704025  | 0.64086924  |
| C | -0.12312913 | 2.07931853  | 1.39805006  | C | -0.04812902 | 2.11842320  | 1.39111786  |
| C | 0.39340774  | 2.94945412  | 2.34596324  | C | 0.50218604  | 3.00642985  | 2.30856799  |
| C | 1.78058537  | 2.99301892  | 2.54621804  | C | 1.89130176  | 3.05927143  | 2.46048916  |
| C | 2.58800502  | 2.13651512  | 1.79403101  | C | 2.67131518  | 2.18063416  | 1.70922295  |
| C | 2.01398082  | 1.27589133  | 0.86345851  | C | 2.06868007  | 1.29804581  | 0.81711942  |
| C | 2.44073589  | 3.89043295  | 3.52849563  | C | 2.60396354  | 3.99919573  | 3.40076162  |
| O | 1.55503911  | 4.69147030  | 4.18030867  | O | 1.75405962  | 4.80620000  | 4.03521641  |
| O | 3.64004815  | 3.92304853  | 3.74303351  | O | 3.81620421  | 3.98125253  | 3.52273783  |
| N | -0.62898831 | -1.35607103 | 0.68768046  | N | -0.64666216 | -1.27958593 | 0.72891576  |
| C | -1.96998728 | -1.32405309 | 0.97518929  | C | -1.99068295 | -1.23650370 | 0.97964817  |
| C | -2.52115853 | -2.16272001 | 1.94332976  | C | -2.56778513 | -2.03215795 | 1.97267998  |
| C | -1.70975450 | -3.06902088 | 2.62598695  | C | -1.77048010 | -2.90282192 | 2.71351795  |
| C | -0.33614647 | -3.08534646 | 2.33249676  | C | -0.38750462 | -2.91649385 | 2.46813011  |
| C | 0.15619856  | -2.22442048 | 1.36993457  | C | 0.12826399  | -2.09966741 | 1.47981649  |
| C | -2.33494831 | -3.96537128 | 3.62752054  | C | -2.42159516 | -3.76147627 | 3.73467240  |
| O | -3.52682191 | -4.03784674 | 3.85631834  | O | -3.61996876 | -3.83757154 | 3.91923109  |
| O | -1.41512602 | -4.73533007 | 4.28771681  | O | -1.51677990 | -4.48442105 | 4.46085350  |
| N | -1.98187024 | 0.41382970  | -0.64818419 | N | -1.96992092 | 0.43727333  | -0.70927278 |
| C | -2.59080674 | 1.37807948  | -1.37479298 | C | -2.56720400 | 1.36110493  | -1.49873513 |
| C | -3.94232613 | 1.65272657  | -1.25437565 | C | -3.93366475 | 1.57859114  | -1.47719668 |
| C | -4.71671399 | 0.90286532  | -0.35807376 | C | -4.73676539 | 0.81581943  | -0.61483225 |
| C | -4.09474120 | -0.09705913 | 0.38565521  | C | -4.12091206 | -0.11514041 | 0.21865830  |
| C | -2.72973090 | -0.32985934 | 0.22491743  | C | -2.73795667 | -0.29390162 | 0.15074495  |
| C | -6.17221032 | 1.12869135  | -0.15382569 | C | -6.21413593 | 0.95840083  | -0.54199714 |
| O | -6.63850422 | 2.19479881  | -0.86457369 | O | -6.67847326 | 1.97313766  | -1.32929455 |
| O | -6.88891174 | 0.44490202  | 0.55034571  | O | -6.94889926 | 0.26040361  | 0.12813429  |
| N | 0.39749678  | 1.27673832  | -2.19840585 | N | 0.43725358  | 1.26702259  | -2.20722934 |
| C | 0.70371306  | 2.03581000  | -3.06188760 | C | 0.68501875  | 2.05957008  | -3.05996241 |
| S | 1.09938444  | 3.08331426  | -4.23002836 | S | 0.99361600  | 3.14338847  | -4.21802811 |
| N | -0.41467367 | -1.46361933 | -2.14646061 | N | -0.42106645 | -1.47606742 | -2.10243945 |
| C | -0.56534725 | -2.36351757 | -2.90888878 | C | -0.64293369 | -2.38364593 | -2.83885469 |
| S | -0.74429733 | -3.59741525 | -3.94468385 | S | -0.91371288 | -3.62582806 | -3.84009158 |
| H | 4.76826174  | 0.79914157  | 0.73324848  | H | 4.81395653  | 0.78752963  | 0.66255031  |
| H | 4.40241861  | -2.41911440 | -2.09970379 | H | 4.37963349  | -2.49660267 | -2.08327984 |
| H | 1.92780549  | -2.05309365 | -2.09466486 | H | 1.90856241  | -2.10147762 | -2.05918009 |
| H | 7.69925758  | -1.90977949 | -1.27378966 | H | 7.68807599  | -2.00951977 | -1.31942712 |
| H | -1.19832831 | 2.04615167  | 1.23004937  | H | -1.12825069 | 2.05117950  | 1.26848503  |
| H | -0.30161709 | 3.57306592  | 2.90646179  | H | -0.15652346 | 3.63835175  | 2.90122558  |
| H | 3.66408672  | 2.15647181  | 1.95991700  | H | 3.75095921  | 2.21032404  | 1.85273084  |
| H | 2.09555913  | 5.22394616  | 4.79557206  | H | 2.25390653  | 5.43157432  | 4.65486734  |
| H | -3.58132731 | -2.12232149 | 2.18319768  | H | -3.63397209 | -1.98558574 | 2.18098410  |
| H | 0.33683495  | -3.76809988 | 2.84638019  | H | 0.27509471  | -3.56442184 | 3.03779980  |
| H | 1.21155578  | -2.21501315 | 1.10579257  | H | 1.19120183  | -2.09070390 | 1.24823124  |
| H | -1.94559958 | -5.26930350 | 4.91048277  | H | -2.05751843 | -4.99570250 | 5.09395847  |
| H | -1.94302057 | 1.92660084  | -2.05564071 | H | -1.90265554 | 1.90995801  | -2.16235201 |
| H | -4.38616742 | 2.44989662  | -1.84594598 | H | -4.37120340 | 2.32663123  | -2.13468818 |
| H | -4.68722901 | -0.66647367 | 1.09857179  | H | -4.73213368 | -0.69152977 | 0.90899539  |
| H | -7.58392730 | 2.25830853  | -0.62705089 | H | -7.64636528 | 1.97031272  | -1.19575087 |
| I | -2.81621437 | 1.00283354  | 4.00524778  | I | -3.11487247 | 1.20209787  | 3.44900882  |
| I | -3.58318326 | 3.70809458  | 2.34636793  | I | 3.04070855  | 7.10138684  | 6.21397324  |

**TS-1**

Charge = 0

Spin-state = 1

Electronic energy = -14377.724707 au.

Free energy Correction = 191.0011 Kcal

Solvation free energy = -26.82 Kcal

Spin-orbit correction = 20.55 Kcal

Imaginary frequency = -10.84 cm<sup>-1</sup>

|    |             |             |             |
|----|-------------|-------------|-------------|
| Ru | -0.00783270 | -0.06992856 | -0.76666171 |
| N  | 1.98758395  | -0.51670934 | -0.71102153 |
| C  | 2.75526274  | 0.27768158  | 0.10208233  |
| C  | 4.14003127  | 0.12418571  | 0.15701061  |
| C  | 4.76445464  | -0.84402301 | -0.62747381 |
| C  | 3.97074468  | -1.64362284 | -1.46265701 |
| C  | 2.59873254  | -1.44914075 | -1.47872156 |
| C  | 6.24900333  | -0.96682283 | -0.53773624 |
| O  | 6.94629668  | -0.28851644 | 0.18854766  |
| O  | 6.73586734  | -1.92984641 | -1.36322974 |
| N  | 0.65001063  | 1.25478107  | 0.66728229  |
| C  | -0.12133161 | 2.10876507  | 1.37882641  |
| C  | 0.39323265  | 2.99112481  | 2.31714021  |
| C  | 1.77788891  | 3.00080720  | 2.54024194  |
| C  | 2.57862163  | 2.11749070  | 1.82036621  |
| C  | 2.00318736  | 1.25431602  | 0.88871093  |
| C  | 2.44184232  | 3.90304098  | 3.53460432  |
| O  | 1.56810051  | 4.79122431  | 4.04775554  |
| O  | 3.61748445  | 3.82810995  | 3.83249957  |
| N  | -0.65895011 | -1.36224413 | 0.68127891  |
| C  | -2.01248884 | -1.36032210 | 0.91380117  |
| C  | -2.58233604 | -2.21823775 | 1.85322958  |
| C  | -1.77758112 | -3.09563412 | 2.57765075  |
| C  | -0.39480727 | -3.08651416 | 2.33772551  |
| C  | 0.11594569  | -2.21568950 | 1.39079118  |
| C  | -2.43515741 | -3.99539092 | 3.56846463  |
| O  | -3.62989584 | -4.01665310 | 3.78210080  |
| O  | -1.54119218 | -4.79389945 | 4.20978707  |
| N  | -2.00038855 | 0.38909035  | -0.70446504 |
| C  | -2.60929094 | 1.32675433  | -1.46679091 |
| C  | -3.97794591 | 1.54236964  | -1.42831768 |
| C  | -4.77011994 | 0.75813453  | -0.57739855 |
| C  | -4.14805524 | -0.21457482 | 0.20268018  |
| C  | -2.76657548 | -0.38696559 | 0.12722467  |
| C  | -6.25170459 | 0.90328210  | -0.46363244 |
| O  | -6.73377865 | 1.88628742  | -1.26643865 |
| O  | -6.94771739 | 0.22303169  | 0.26182376  |
| N  | 0.39401853  | 1.29413014  | -2.15889568 |
| C  | 0.67804689  | 2.14156746  | -2.94742278 |
| S  | 1.03010590  | 3.29437884  | -4.01598148 |
| N  | -0.41079880 | -1.46337131 | -2.13085358 |
| C  | -0.67325459 | -2.35793272 | -2.87308009 |
| S  | -0.99712505 | -3.57384922 | -3.88016198 |
| H  | 4.75786309  | 0.75255306  | 0.79680943  |

|   |             |             |             |
|---|-------------|-------------|-------------|
| H | 4.41651765  | -2.40263812 | -2.10204358 |
| H | 1.93935836  | -2.03031734 | -2.12045218 |
| H | 7.70528208  | -1.92497483 | -1.23516845 |
| H | -1.18838236 | 2.07464939  | 1.16829047  |
| H | -0.27190520 | 3.65395910  | 2.87331603  |
| H | 3.65136193  | 2.12173979  | 2.00922062  |
| H | 2.03717735  | 5.32232060  | 4.72123664  |
| H | -3.65489663 | -2.22306777 | 2.04167773  |
| H | 0.27176980  | -3.75536089 | 2.87795197  |
| H | 1.18015712  | -2.18783141 | 1.16571303  |
| H | -2.06760633 | -5.33784009 | 4.82882759  |
| H | -1.95127515 | 1.89611721  | -2.12038021 |
| H | -4.42235736 | 2.30788812  | -2.06083730 |
| H | -4.76551043 | -0.82665802 | 0.85851526  |
| H | -7.70037758 | 1.90229542  | -1.11921793 |
| I | -1.92374123 | 5.30514879  | 5.53316670  |

### TS-2

Charge = 0  
Spin-state = 1/2  
Electronic energy = -21495.343161 au.  
Free energy Correction = 186.7384 Kcal  
Solvation free energy = -43.59 Kcal  
Spin-orbit correction = 33.17 Kcal  
Imaginary frequency = -28.29 cm<sup>-1</sup>

|    |             |             |             |
|----|-------------|-------------|-------------|
| Ru | 0.01485321  | -0.06036141 | -0.92241581 |
| N  | 1.99895437  | -0.52973254 | -0.86402254 |
| C  | 2.78598884  | 0.28472232  | -0.08595737 |
| C  | 4.16872760  | 0.11158674  | -0.03579991 |
| C  | 4.77352047  | -0.89991701 | -0.78244816 |
| C  | 3.95837676  | -1.72256345 | -1.57726947 |
| C  | 2.59152532  | -1.50442111 | -1.59519687 |
| C  | 6.24992833  | -1.04479443 | -0.70645047 |
| O  | 6.98550548  | -0.34218570 | -0.04018210 |
| O  | 6.71419482  | -2.07207666 | -1.47730664 |
| N  | 0.71146498  | 1.36146048  | 0.38611573  |
| C  | -0.04848699 | 2.24514944  | 1.06311815  |
| C  | 0.45959603  | 3.06720613  | 2.05885958  |
| C  | 1.82342416  | 2.99929994  | 2.36543354  |
| C  | 2.62121839  | 2.11260638  | 1.64628084  |
| C  | 2.05407135  | 1.30004506  | 0.66620349  |
| C  | 2.42900956  | 3.74144571  | 3.52334972  |
| O  | 1.54301725  | 4.57223164  | 4.08146413  |
| O  | 3.57365824  | 3.54957114  | 3.89293543  |
| N  | -0.59596204 | -1.16177218 | 0.67725324  |
| C  | -1.93522334 | -1.08931354 | 0.97849876  |
| C  | -2.46815207 | -1.76734622 | 2.07223570  |
| C  | -1.64129578 | -2.53216318 | 2.89265375  |
| C  | -0.27257772 | -2.58808693 | 2.58798191  |
| C  | 0.20094056  | -1.90299053 | 1.48401742  |
| C  | -2.25136044 | -3.22873092 | 4.05370879  |

### TS-3

Charge = 0  
Spin-state = 1/2  
Electronic energy = -21495.342701 au.  
Free energy Correction = 184.9966 Kcal  
Solvation free energy = -43.40 Kcal  
Spin-orbit correction = 33.33 Kcal  
Imaginary frequency = -19.40 cm<sup>-1</sup>

|    |             |             |             |
|----|-------------|-------------|-------------|
| Ru | 0.02606229  | 0.02063905  | -0.70231298 |
| C  | 2.85198463  | 2.18699200  | 1.63804509  |
| C  | 2.18977023  | 1.32825853  | 0.76068738  |
| N  | 0.83079842  | 1.39989627  | 0.59129937  |
| C  | 0.14304218  | 2.32866718  | 1.29170692  |
| C  | 0.74740517  | 3.20968827  | 2.17561439  |
| C  | 2.13470203  | 3.13938769  | 2.35718838  |
| C  | 2.84404571  | 0.26923780  | -0.00493601 |
| N  | 1.98840608  | -0.52850413 | -0.72584371 |
| C  | 2.50597947  | -1.54215134 | -1.46172932 |
| C  | 3.86239212  | -1.81459608 | -1.50398358 |
| C  | 4.74687824  | -1.01044593 | -0.76648025 |
| C  | 4.21924796  | 0.04018666  | -0.01533974 |
| N  | 0.39663360  | 1.25664013  | -2.23641722 |
| C  | 0.58526209  | 1.97421586  | -3.16726092 |
| S  | 0.81803934  | 2.96509973  | -4.42237151 |
| C  | 6.21832881  | -1.21570726 | -0.75407048 |
| O  | 7.01041352  | -0.53553732 | -0.13095921 |
| C  | 2.87669973  | 4.01705967  | 3.33267089  |
| O  | 2.06448387  | 4.93081837  | 3.85800654  |
| N  | -1.92704467 | 0.58208680  | -0.55075140 |
| C  | -2.68122826 | -0.12868316 | 0.35009903  |
| C  | -4.04832692 | 0.10615405  | 0.48731049  |
| C  | -4.66947504 | 1.07936709  | -0.29395399 |
| C  | -3.88713700 | 1.80262038  | -1.20890171 |
| C  | -2.53472859 | 1.52394432  | -1.31071426 |

|   |             |             |             |   |             |             |             |
|---|-------------|-------------|-------------|---|-------------|-------------|-------------|
| O | -3.44115431 | -3.24628036 | 4.30301008  | C | -1.92181206 | -1.08946547 | 1.14331278  |
| O | -1.32387766 | -3.86642954 | 4.82282283  | N | -0.57756280 | -1.14111806 | 0.84298830  |
| N | -1.96139255 | 0.42778687  | -0.85661648 | C | 0.20846660  | -1.96639679 | 1.58018785  |
| C | -2.58806623 | 1.26844123  | -1.71452153 | C | -0.27802300 | -2.76014424 | 2.60064441  |
| C | -3.95117410 | 1.50365844  | -1.66286178 | C | -1.65232638 | -2.72921832 | 2.89985111  |
| C | -4.72593513 | 0.84331458  | -0.69514221 | C | -2.46660704 | -1.87515807 | 2.15545505  |
| C | -4.08537583 | -0.02679653 | 0.18667153  | C | -6.13021264 | 1.29329153  | -0.11717457 |
| C | -2.70868826 | -0.22319276 | 0.09408398  | O | -6.60856927 | 2.29415053  | -0.90905590 |
| C | -6.19622979 | 1.01585186  | -0.56940428 | C | -2.27709887 | -3.55102562 | 3.96314258  |
| O | -6.69324638 | 1.92017311  | -1.46272462 | O | -3.46479302 | -3.56172176 | 4.22769942  |
| O | -6.89956238 | 0.42805081  | 0.22950212  | N | -0.52872063 | -1.42823245 | -1.98158796 |
| N | 0.39030612  | 1.14961866  | -2.47795875 | C | -0.77928378 | -2.35013445 | -2.69053931 |
| C | 0.58007240  | 1.89957617  | -3.38192056 | S | -1.09544478 | -3.61395020 | -3.65100936 |
| S | 0.80998910  | 2.92857651  | -4.60913490 | O | -6.83659913 | 0.65708448  | 0.64087121  |
| N | -0.43397679 | -1.57706996 | -2.16194619 | O | -1.36630003 | -4.31708999 | 4.63399104  |
| C | -0.63714630 | -2.52408724 | -2.85243061 | O | 6.60419196  | -2.27084527 | -1.52975988 |
| S | -0.88820130 | -3.82051910 | -3.78933452 | O | 4.05994406  | 3.85749994  | 3.57797033  |
| H | 4.79526417  | 0.76224593  | 0.57219134  | H | 4.90039170  | 0.67529383  | 0.54882096  |
| H | 4.38570876  | -2.51653653 | -2.18573270 | H | 4.22828147  | -2.63669954 | -2.11520918 |
| H | 1.91752613  | -2.10205601 | -2.20592897 | H | 1.78051794  | -2.12267476 | -2.02861082 |
| H | 7.68289807  | -2.06328841 | -1.34941608 | H | 7.57753036  | -2.30045396 | -1.44821121 |
| H | -1.10710160 | 2.25709389  | 0.81460032  | H | -0.93330112 | 2.35183401  | 1.13289310  |
| H | -0.20344401 | 3.72243121  | 2.61762222  | H | 0.13294191  | 3.91709810  | 2.73691131  |
| H | 3.67604673  | 2.04214729  | 1.91060316  | H | 3.92829624  | 2.12782935  | 1.79862249  |
| H | 1.80383778  | 4.78832966  | 5.02708431  | H | -3.52933430 | -1.83597801 | 2.38961380  |
| H | -3.52646600 | -1.70143230 | 2.31850654  | H | 0.40035186  | -3.40446066 | 3.15572931  |
| H | 0.41545379  | -3.15772876 | 3.20855709  | H | 1.26249209  | -1.97774534 | 1.31105253  |
| H | 1.25349742  | -1.93281755 | 1.21094100  | H | -1.88913191 | -4.80036228 | 5.30314236  |
| H | -1.83118913 | -4.25463692 | 5.56211195  | H | -1.88661133 | 2.04096674  | -2.01586660 |
| H | -1.94491441 | 1.74113675  | -2.45436902 | H | -4.32907896 | 2.56910528  | -1.84162427 |
| H | -4.40774965 | 2.18620204  | -2.37629095 | H | -4.65283681 | -0.45619323 | 1.19713984  |
| H | -4.68141860 | -0.54309698 | 0.93727832  | H | -7.56237843 | 2.34834253  | -0.70354021 |
| H | -7.65372854 | 1.94778353  | -1.28511854 | H | 2.50057040  | 5.44531768  | 4.60561007  |
| I | -1.33798503 | 1.41261441  | 4.76686564  | I | 2.61850657  | 6.76107110  | 6.64791758  |
| I | 1.33374396  | 4.68983706  | 7.43551247  | I | -2.02265387 | 4.59077569  | 4.64805567  |

#### TS-4

Charge = 0  
Spin-state = 1/2  
Electronic energy = -21495.350669 au.  
Free energy Correction = 184.4405 Kcal  
Solvation free energy = -45.66 Kcal  
Spin-orbit correction = 30.58 Kcal  
Imaginary frequency = --4.42 cm<sup>-1</sup>

|    |            |             |             |
|----|------------|-------------|-------------|
| Ru | 0.00775696 | -0.11337982 | -0.79944364 |
| N  | 2.00622984 | -0.50807956 | -0.75285111 |
| C  | 2.75045090 | 0.26994007  | 0.10659101  |
| C  | 4.13246464 | 0.11433149  | 0.19991744  |
| C  | 4.78885510 | -0.82917831 | -0.59152198 |
| C  | 4.01881462 | -1.60068508 | -1.48454055 |
| C  | 2.65042690 | -1.40854675 | -1.53665159 |

#### TS-5

Charge = 0  
Spin-state = 1/2  
Electronic energy = -21495.350212 au.  
Free energy Correction = 183.4019 Kcal  
Solvation free energy = -7.79 Kcal  
Spin-orbit correction = 29.67 Kcal  
Imaginary frequency = -8.94 cm<sup>-1</sup>

|    |             |             |             |
|----|-------------|-------------|-------------|
| Ru | 0.00238373  | -0.12260726 | -0.88408776 |
| C  | 2.65702486  | 2.10630459  | 1.57830596  |
| C  | 2.06067247  | 1.21906726  | 0.68403651  |
| N  | 0.70687907  | 1.27430724  | 0.42146281  |
| C  | -0.02430636 | 2.23311042  | 1.04368545  |
| C  | 0.51535166  | 3.13544681  | 1.93958860  |
| C  | 1.89457518  | 3.07721443  | 2.22613597  |

|   |             |             |             |   |             |             |             |
|---|-------------|-------------|-------------|---|-------------|-------------|-------------|
| C | 6.25710133  | -0.95961752 | -0.45634523 | C | 2.77737799  | 0.17804377  | -0.03917935 |
| O | 6.95218295  | -0.31522896 | 0.30940334  | N | 1.98468197  | -0.59983984 | -0.85435661 |
| O | 6.78019018  | -1.90405921 | -1.29671049 | C | 2.57318642  | -1.56535811 | -1.60304233 |
| N | 0.62272648  | 1.23128774  | 0.61275739  | C | 3.93069830  | -1.82513353 | -1.55415118 |
| C | -0.16428474 | 2.09995344  | 1.29638866  | C | 4.74831548  | -1.05599705 | -0.70236046 |
| C | 0.31829338  | 2.97180034  | 2.25639980  | C | 4.15074709  | -0.04532090 | 0.05068478  |
| C | 1.69854562  | 2.97072147  | 2.53806259  | N | 0.33749794  | 1.13760117  | -2.41186369 |
| C | 2.51786718  | 2.09047832  | 1.83320166  | C | 0.47885391  | 1.91901726  | -3.29770049 |
| C | 1.97435063  | 1.23108155  | 0.88003466  | S | 0.64767474  | 2.99303896  | -4.49655624 |
| C | 2.32982723  | 3.85615687  | 3.55003735  | C | 6.21033304  | -1.25624203 | -0.57264800 |
| O | 1.42075107  | 4.64835357  | 4.17440973  | O | 6.94330290  | -0.61418434 | 0.15801275  |
| O | 3.52211814  | 3.87867596  | 3.80443261  | C | 2.57600266  | 3.98886412  | 3.17731158  |
| N | -0.55649842 | -1.44511070 | 0.62985405  | O | 1.71744963  | 4.88418504  | 3.74191208  |
| C | -1.90028764 | -1.45495448 | 0.94555130  | N | -1.97449453 | 0.36647714  | -0.73924396 |
| C | -2.41412285 | -2.34993504 | 1.88039589  | C | -2.68694055 | -0.30139612 | 0.23263678  |
| C | -1.57467995 | -3.26152366 | 2.52330596  | C | -4.04915784 | -0.06356435 | 0.41321207  |
| C | -0.20307071 | -3.24192286 | 2.19461748  | C | -4.71694244 | 0.84893791  | -0.40272171 |
| C | 0.25190007  | -2.33708243 | 1.25679205  | C | -3.98194023 | 1.50602148  | -1.40998000 |
| C | -2.16563524 | -4.19581544 | 3.50345315  | C | -2.63229968 | 1.23593845  | -1.54537386 |
| O | -3.34661848 | -4.25246269 | 3.79868401  | C | -1.90223631 | -1.24456052 | 1.01567196  |
| O | -1.23179124 | -5.02276875 | 4.07063595  | N | -0.57136962 | -1.32752118 | 0.65315958  |
| N | -1.98625726 | 0.30397859  | -0.65792480 | C | 0.21922378  | -2.20030044 | 1.32839072  |
| C | -2.64240572 | 1.25235002  | -1.36864460 | C | -0.23590054 | -2.98998717 | 2.36469289  |
| C | -3.99450684 | 1.50157877  | -1.20842027 | C | -1.59195514 | -2.90580506 | 2.74980280  |
| C | -4.72909393 | 0.73362214  | -0.28772278 | C | -2.41476717 | -2.02006249 | 2.05310004  |
| C | -4.06316430 | -0.25986930 | 0.42716252  | C | -6.16372966 | 1.06794911  | -0.17091950 |
| C | -2.69722160 | -0.46393554 | 0.23376295  | O | -6.70109127 | 1.97837727  | -1.03716829 |
| C | -6.18118382 | 0.92448443  | -0.03568218 | C | -2.18287909 | -3.70401642 | 3.84300812  |
| O | -6.69672829 | 1.97206368  | -0.73844224 | O | -3.34783157 | -3.65541140 | 4.19961136  |
| O | -6.85305028 | 0.23243864  | 0.70547098  | N | -0.46616250 | -1.58747160 | -2.17952783 |
| N | 0.33472155  | 1.24473399  | -2.24111763 | C | -0.68199574 | -2.51431543 | -2.89301182 |
| C | 0.53183345  | 2.03076855  | -3.11223631 | S | -0.95094803 | -3.78341986 | -3.86208376 |
| S | 0.77686090  | 3.11477100  | -4.28811135 | O | -6.82700643 | 0.51467706  | 0.68800723  |
| N | -0.37077444 | -1.51214123 | -2.19543362 | O | -1.27049911 | -4.53159421 | 4.44173409  |
| C | -0.51435126 | -2.40894063 | -2.96310349 | O | 6.67471044  | -2.26248178 | -1.37346818 |
| S | -0.68507095 | -3.63646626 | -4.00641789 | O | 3.76495588  | 3.95291321  | 3.43857526  |
| H | 4.72432247  | 0.72585050  | 0.87931917  | H | 4.78124389  | 0.56405076  | 0.69659104  |
| H | 4.48540295  | -2.33601452 | -2.13625174 | H | 4.35226355  | -2.61220839 | -2.17536517 |
| H | 2.01239189  | -1.97151550 | -2.21560103 | H | 1.89922933  | -2.12589401 | -2.24843162 |
| H | 7.74045354  | -1.88893810 | -1.11777828 | H | 7.63645605  | -2.29113327 | -1.20389368 |
| H | -1.22291632 | 2.08134623  | 1.04704595  | H | -1.08265791 | 2.25459856  | 0.79194003  |
| H | -0.36886559 | 3.64370513  | 2.77288171  | H | -0.12186435 | 3.87994547  | 2.41191136  |
| H | 3.58545514  | 2.09239927  | 2.04914117  | H | 3.72438761  | 2.06165997  | 1.79077558  |
| H | 1.92666708  | 5.18862012  | 4.81172961  | H | -3.46333652 | -1.95359990 | 2.33997567  |
| H | -3.47488150 | -2.35828669 | 2.12663353  | H | 0.44752899  | -3.66887508 | 2.86981187  |
| H | 0.49384132  | -3.93281325 | 2.66390225  | H | 1.25493339  | -2.24780667 | 0.99815149  |
| H | 1.30050552  | -2.30411818 | 0.96827139  | H | -1.77754643 | -4.99555528 | 5.13592213  |
| H | -1.74282676 | -5.58065104 | 4.68854705  | H | -2.02115431 | 1.71019119  | -2.31128946 |
| H | -2.02797903 | 1.81147044  | -2.07214642 | H | -4.46102057 | 2.21415100  | -2.08232874 |
| H | -4.47266237 | 2.28537495  | -1.79147345 | H | -4.61700487 | -0.58508452 | 1.18235589  |
| H | -4.63138411 | -0.85722470 | 1.13846679  | H | -7.64406539 | 2.03356176  | -0.78761517 |
| H | -7.63505718 | 2.02086884  | -0.47051837 | H | 2.26011630  | 5.42528628  | 4.34900009  |
| I | -5.06675896 | 4.36115211  | 3.83389772  | I | 2.38101957  | 10.73579477 | 8.65967512  |
| I | -2.47804341 | 5.84909724  | 4.25126560  | I | 0.98046438  | 8.28594267  | 9.46555519  |
